# Supplementary material
Source: publisher site journal article supplement (https://www.spandidos-publications.com/2295/downloadSupplementary)

Figure S1. The expression of pEGFR in HCC827ER and H1975 cells subjected to HJD/erlotinib alone or HJD plus erlotinib.

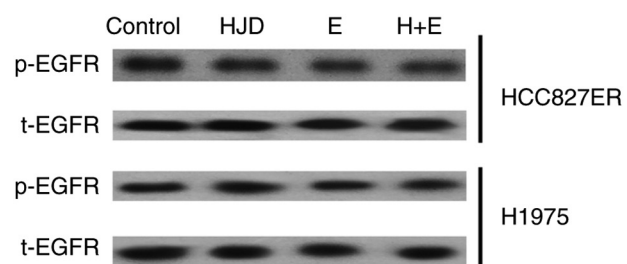

Figure S2. The sections of main organs from mice bearing HCC827ER xenograft were stained with H&E staining. Nude mice (n=6) were given saline (control group), 20 mg/kg erlotinib, 50 mg/kg HJD or both, respectively.

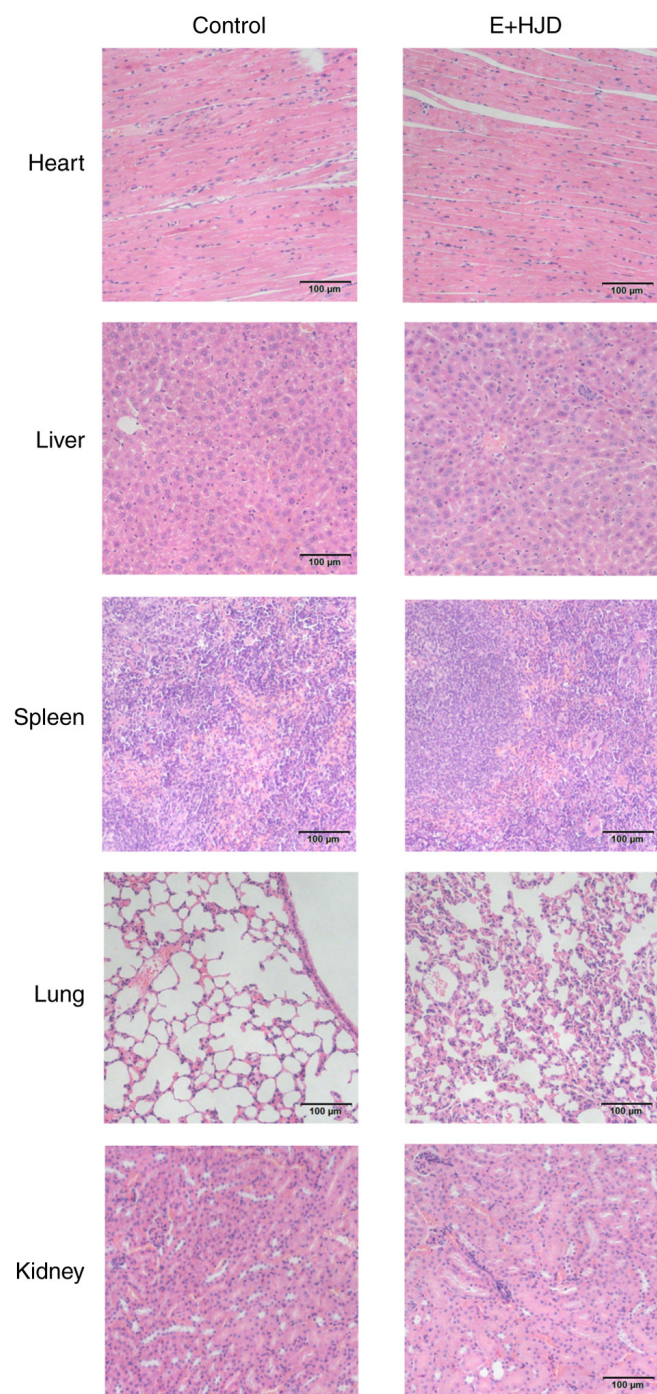

Figure S3. The sections of main organs from mice-bearing H1975 xenograft were stained with H&E staining. Nude mice (n=6) were given saline (control group), 20 mg/kg erlotinib, 50 mg/kg HJD or both, respectively.

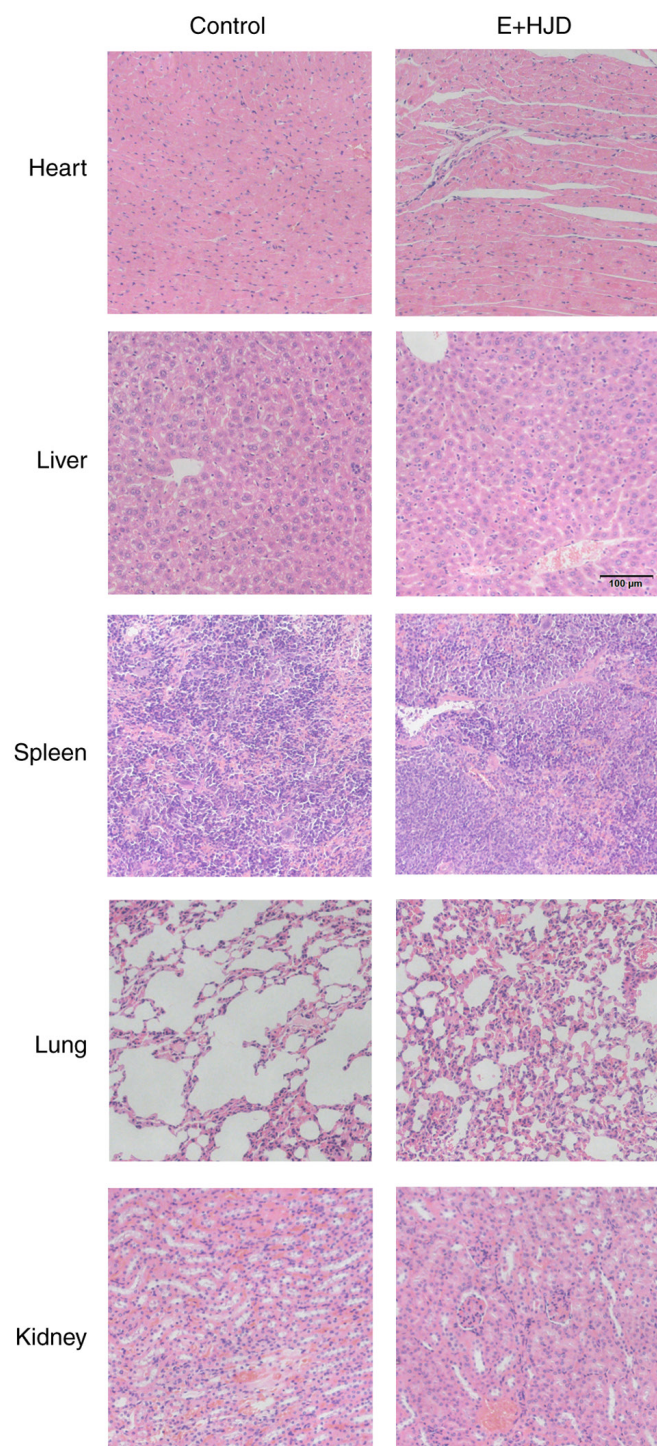

Supplement: Supplementary file 1 [file downloadSupplementary]
